# Supplementary material
Source: PubMed Central journal article supplement (PMC11028611)
Supplement: 262_2014_1540_MOESM1_ESM.pdf [file 262_2014_1540_MOESM1_ESM.pdf]

**Supplementary Table 1:** Primers used for RT-qPCR

| Gene symbol<br>(mouse) | Name                                                                       | Cat.No.    | Amplicon<br>length (bp) | Gene Bank<br>Accession<br>Number |
|------------------------|----------------------------------------------------------------------------|------------|-------------------------|----------------------------------|
| IL1b                   | Interleukin<br>1beta                                                       | QT01048355 | 150                     | NM_008361                        |
| IL2                    | Interleukin 2                                                              | PPM02937C  | 111                     | NM_008366.3                      |
| IL4                    | Interleukin 4                                                              | QT00160678 | 104                     | NM_021283                        |
| IL6                    | Interleukin 6                                                              | QT00098875 | 128                     | NM_031168                        |
| IL10                   | Interleukin 10                                                             | PPM03017C  | 81                      | NM_010548.2                      |
| IL12b                  | Interleukin 12b                                                            | QT00153643 | 97                      | NM_008352                        |
| IL18                   | Interleukin 18                                                             | QT00171129 | 149                     | NM_008360                        |
| Tnf                    | Tumor necrosis<br>factor                                                   | QT00104006 | 112                     | NM_013693                        |
| Ifng                   | Interferon<br>gamma                                                        | PPM03121A  | 95                      | NM_008337.3                      |
| Tgfbrap                | Transforming<br>growth factor,<br>beta receptor<br>associated<br>protein 1 | QT01543241 | 102                     | NM_001013025                     |
| Actb                   | Actin, beta                                                                | QT01136772 | 77                      | NM_007393                        |
| Gapdh                  | Glyceraldehyde-<br>3-phosphate<br>dehydrogenase                            | QT01658692 | 144                     | NM_008084                        |

Cancer Immunology, Immunotherapy (submitted in 2014) – Ketil André Camilio et al.
